# Supplementary material for: The similarity and variability of the iridoid glycoside profile and antioxidant capacity of aerial and underground parts of Lamiophlomis rotata according to UPLC-TOF-MS and multivariate analyses
Source: Royal Society of Chemistry journal article supplement (doi:10.1039/c7ra10143k), 2018-01-01
Supplement: c7ra10143k1.pdf [file c7ra10143k1.pdf]

The captions of the supplementary figures

Supplementary Fig.1 Selected ion intensity trend plots. a: shanzhiside methylester: ( $t_R$  10.67 min,  $m/z$  429.1360); b: 8-*O*-shanzhiside methyl ester: ( $t_R$  10.67 min,  $m/z$  429.1360), ●: aerial parts; ▲: roots

Supplementary Fig.2 TIC chromatography (positive) of IG standards and NO.12 sample

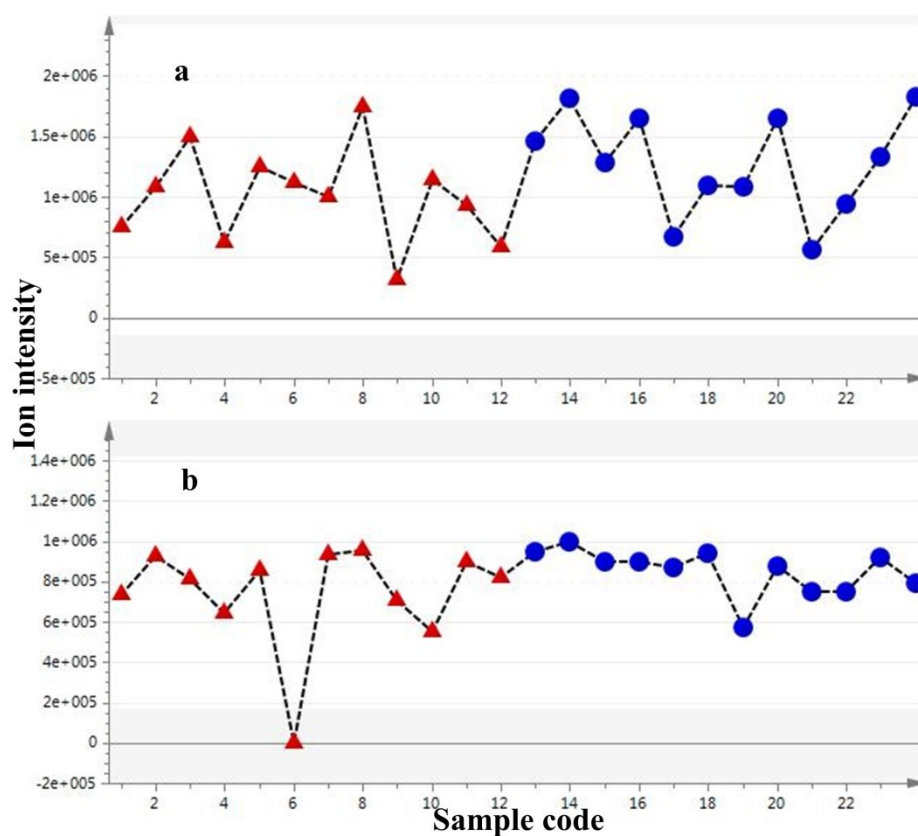

Supplementary Fig.1

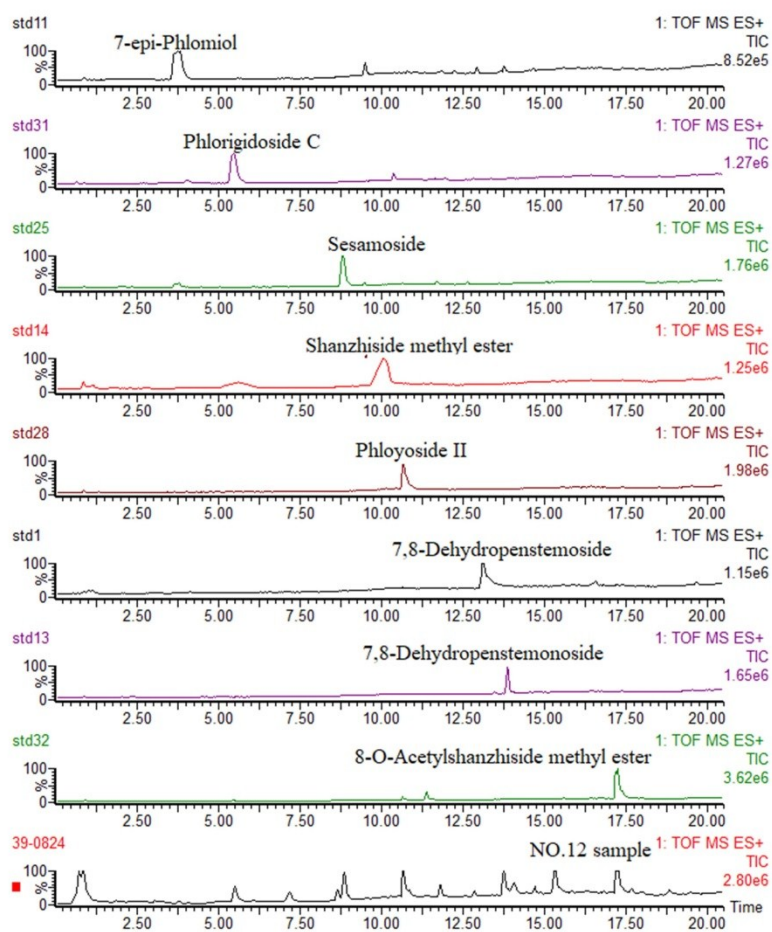

Supplementary Fig.2
